# Supplementary material for: A single-cell atlas depicting the cellular and molecular features in human anterior cruciate ligamental degeneration: A single cell combined spatial transcriptomics study
Source: eLife. 2023 Nov 16;12:e85700. doi: 10.7554/eLife.85700 (PMC10688969; doi:10.7554/eLife.85700)
Supplement: Supplementary file 1. [file elife-85700-supp1.xlsx]

## Sheet: Sheet1
	sample name	donor age	donor sex	donor status
	L1	18	female	normal
	L3	22	male	normal
	L4	35	female	normal
	L10	23	male	normal
	L2	65	female	diseased
	L5	70	male	diseased
	L6	66	female	diseased
	L8	74	male	diseased
	L1	53	female	normal
	L8	35	male	diseased
